# Supplementary material for: Characterization of a new Leishmania major strain for use in a controlled human infection model
Source: PubMed Central journal article supplement (PMC7801518; doi:10.1038/s41467-020-20569-3), 2021-01-11
Supplement: 41467_2020_20569_MOESM1_ESM.pdf [file 41467_2020_20569_MOESM1_ESM.pdf]

# Characterization of a new *Leishmania major* strain for use in a controlled human infection model. Ashwin et.al

## Supplementary Information

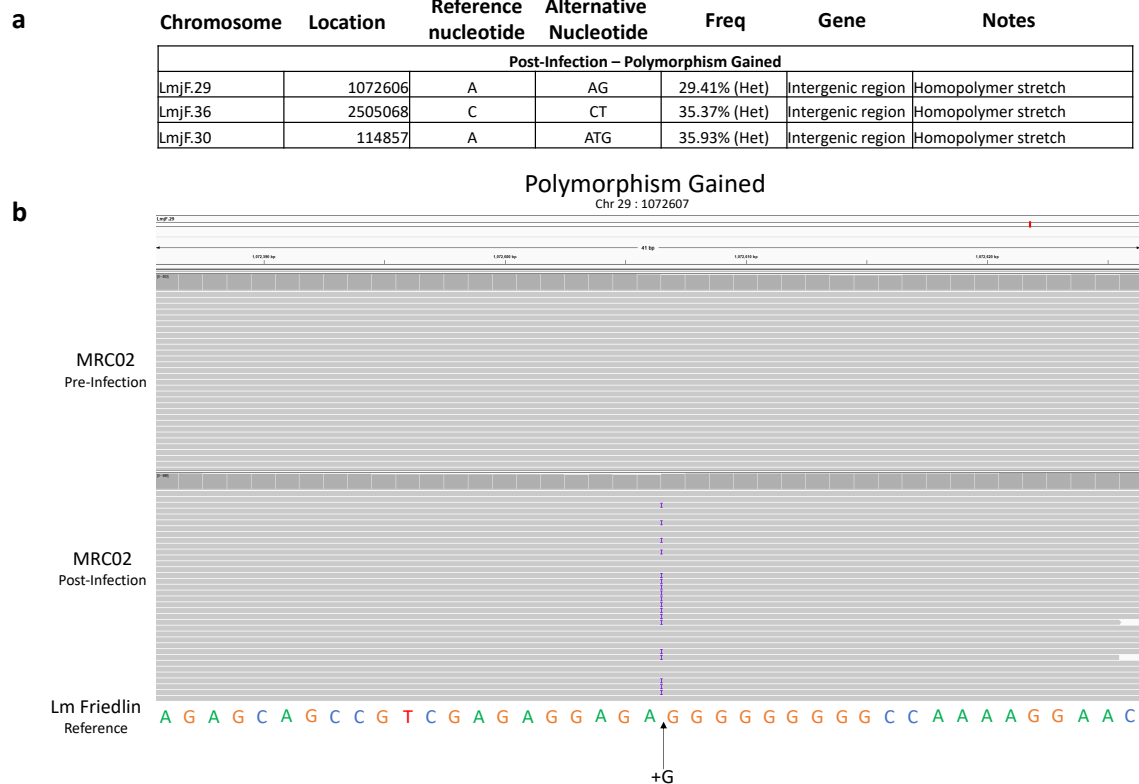

### Supplementary Figure 1 Polymorphisms between *L. major* MRC-02 before and after mouse passage

- a** Specific location and details of each polymorphism. Note that all the changes were in homopolymer stretches in non-coding regions and were in less than 50% of the reads.
- b** Example of polymorphism gained on the Chromosome 29, location 1072607 where a G nucleotide was inserted in the post-infection genome in 29% of the reads as indicated.

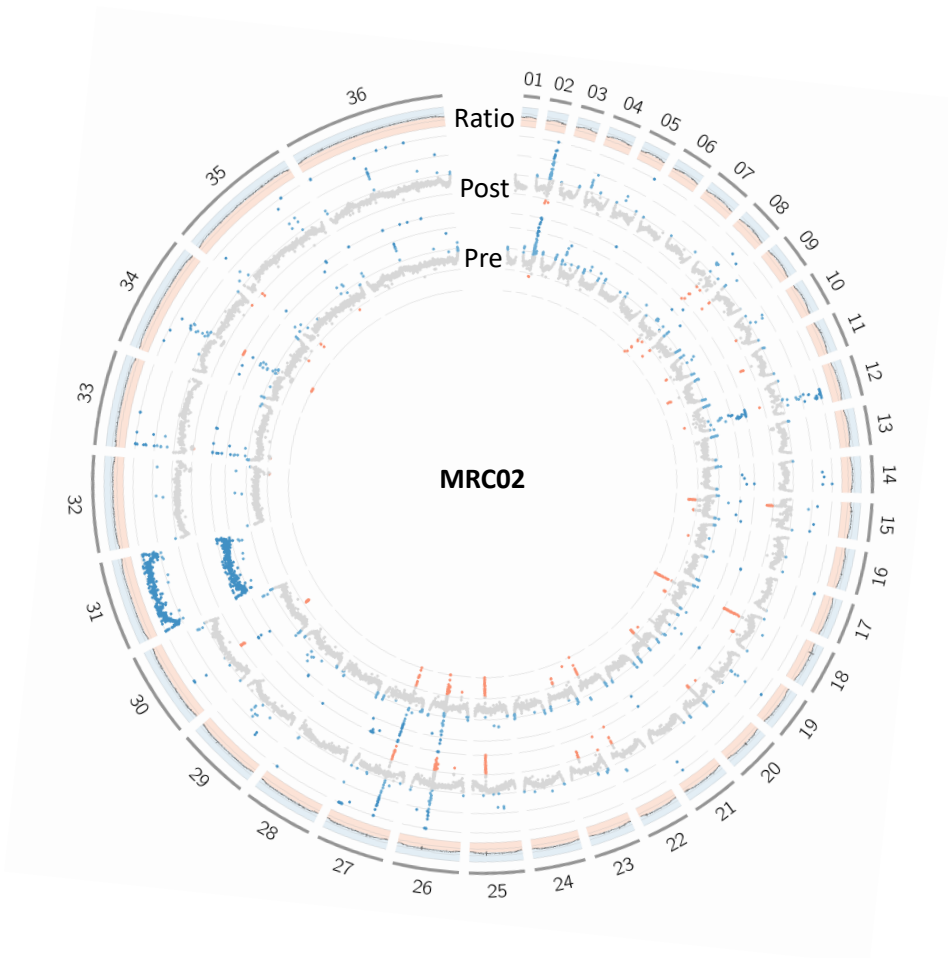

**Supplementary Figure 2. Gene copy number variations over chromosomes 1 to 36.**

Raw sequencing depth per gene across all chromosomes plotted on a scale of 0-1500 and color-coded according to lower (red), median (grey), or higher (blue) read depth (Pre and Post rings). Note that chromosome 31 is tetraploid (Blue) in *L. major* while all other chromosomes are normally diploid. Coverage change ratio between the BALB/c passage (Post) and cultured (Pre) *L. major* MRC-02 parasites shown in the outer ring on a scale of 0 to 2.

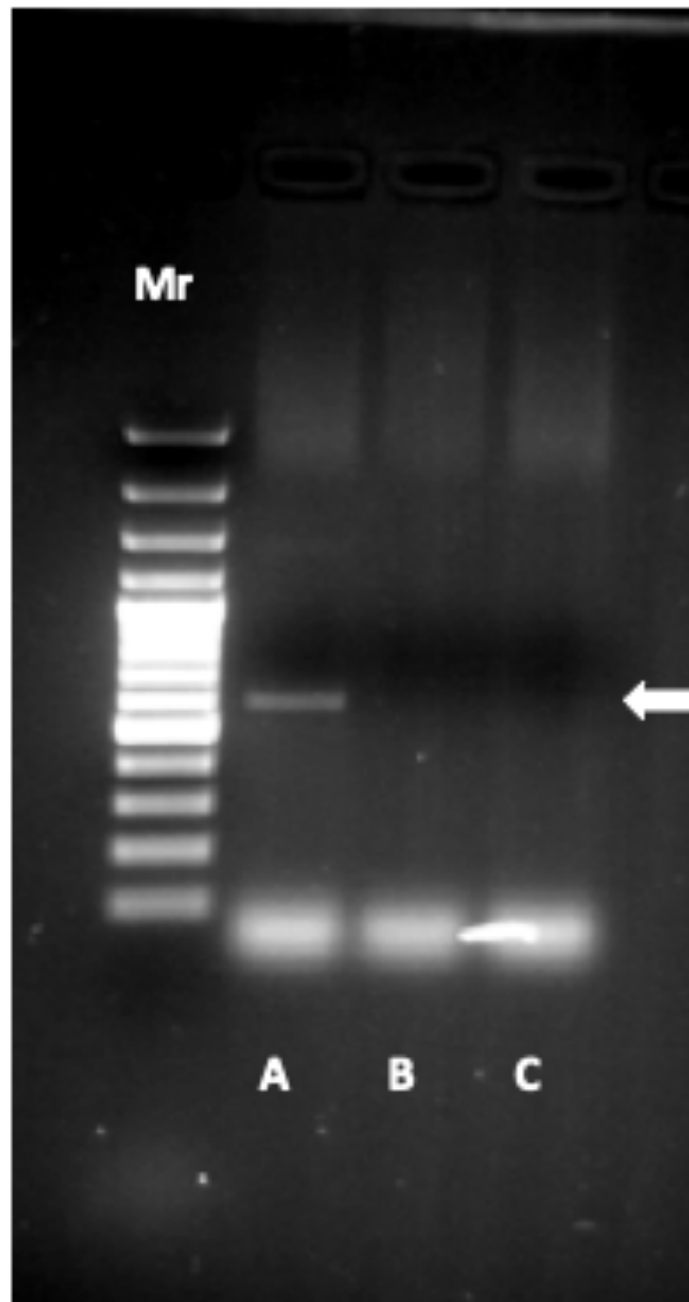

**Supplementary Figure 3. Analysis of LRV2 presence in *Leishmania* strains by RT-PCR.**

RNA was purified from each isolate and reverse transcribed into cDNA. Specific PCR targeting the RNA - dependent RNA polymerase (*RdRp*) gene of LRV2 was carried out. Arrow indicates 526 bp product. Mr - 100 bp molecular weight marker. Lane A - *L. aethiopica* LRC-L494 positive control; Lane B - *L. major\_MRC01*; *L. major\_MRC02*. Data are derived from a single experiment.

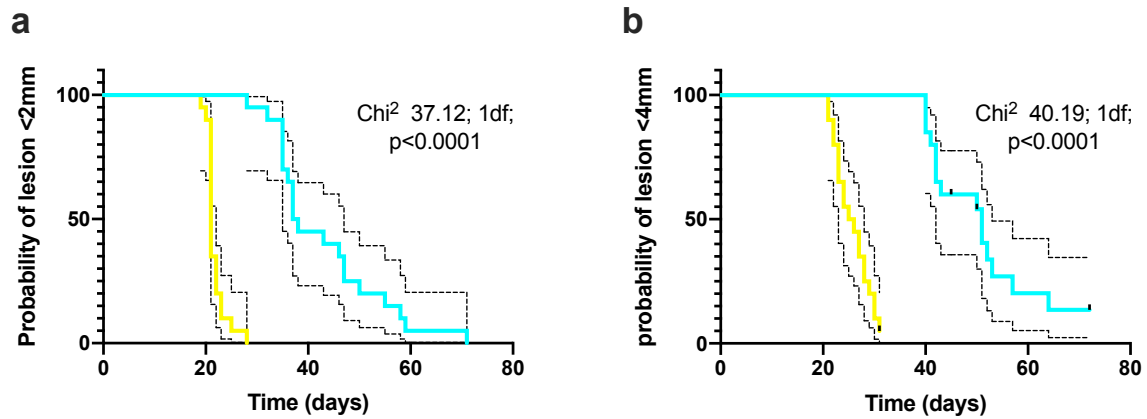

**Supplementary Figure 4. Rate of lesion development for *L. major* MRC-01 and *L. major* MRC-02 in BALB/c mice after needle challenge**

Time to event (lesion size) is shown as Kaplan Meier plots for mice infected with *L. major* MRC-01 (n=20, blue) and *L. major* MRC-02 (n=20, yellow). **a** lesion of >2mm. **b** lesion of >4mm. Data were analysed using the Log-rank (Mantel-Cox) test and a two tail p value calculated. Dotted lines represent 95% CI. Median times to lesion > 2mm were 37.5 and 21.0 days, for *L. major* MRC-01 and *L. major* MRC-02 respectively (ratio 1.786, 95% CI of ratio 0.96 to 3.32; p<0.0001). Median times to lesion >4mm were 51.0 vs 25.5 for *L. major* MRC-01 and *L. major* MRC-02 respectively (ratio 2.0, 95% CI of ratio 1.02 to 3.94; p<0.0001).

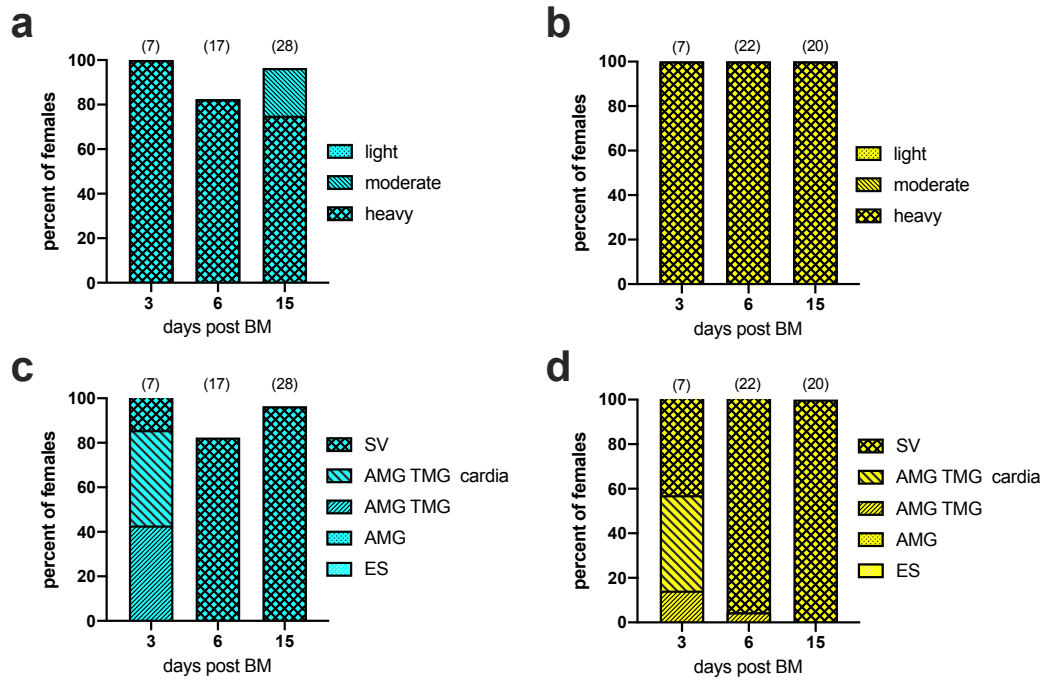

**Supplementary Figure 5. Sand fly development of parasites recovered from Research Banks**

Infection rates and intensity of infections in *P. duboscqi* females infected with *L. major* MRC-01 (a) and *L. major* MRC-02 (b). Localisation of infections in *P. duboscqi* females infected with *L. major* MRC-01 (c) and *L. major* MRC-02 (d). Number of sand flies dissected is shown above each bar.

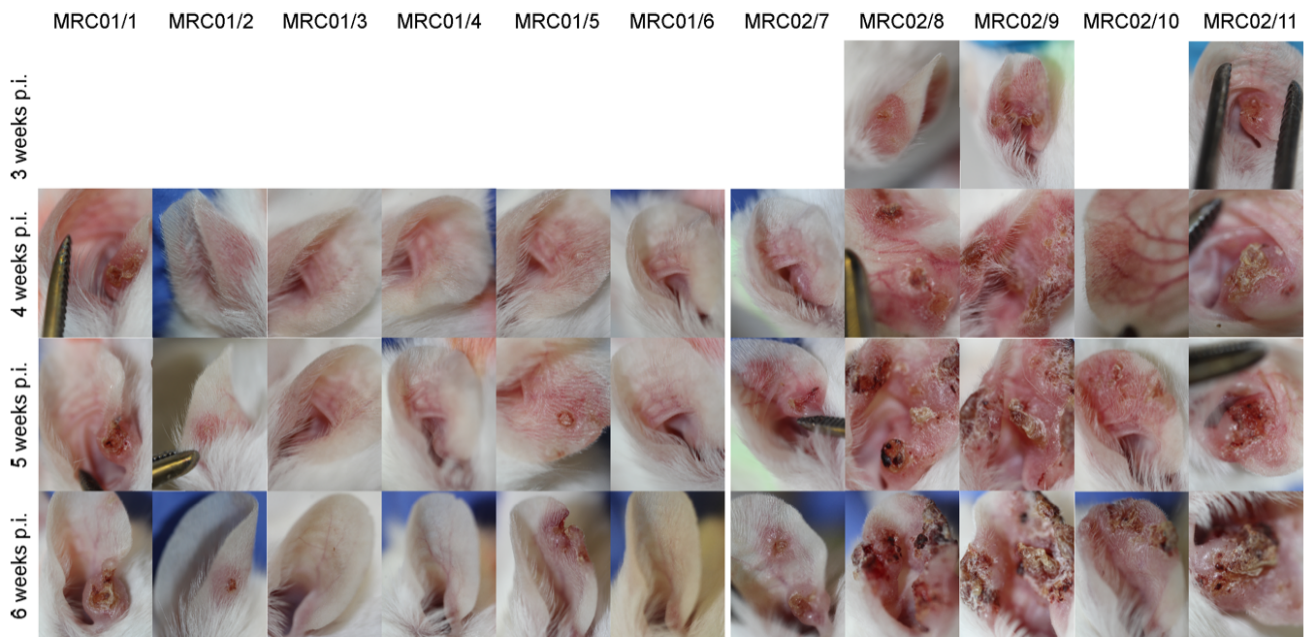

**Supplementary Figure 6. Development of lesions in BALB/c mice after exposure to infected sand fly bites.**

Images show ears photographed at weeks 3-6 post exposure to 10 *P. duboscqi* infected with *L. major* MRC-01 (n=6) and *L. major* MRC-02 (n=5).

| Isolate | Sample       | No sand flies | feeding rate* | No. parasite positive females** | No. parasites per ear | Mean no. parasites per engorged sand fly | Mean No. parasites / all infected sand flies |
|---------|--------------|---------------|---------------|---------------------------------|-----------------------|------------------------------------------|----------------------------------------------|
| MRC-01  | 1            | 10            | 70%           | 4+1                             | 0                     | 0                                        | 0                                            |
|         | 2            | 10            | 60%           | 2+3                             | 143                   | 72                                       | 29                                           |
|         | 3            | 10            | 0             | 0+4                             | 70                    | 0                                        | 18                                           |
|         | 4            | 10            | 40%           | 3+2                             | 7240                  | 2413                                     | 1448                                         |
|         | 5            | 10            | 50%           | 2+4                             | 506                   | 253                                      | 84                                           |
|         | 6            | 10            | 20%           | 2+6                             | 708                   | 354                                      | 89                                           |
|         | <b>Total</b> | <b>60</b>     | <b>40%</b>    | <b>13+20</b>                    | <b>8667</b>           | <b>667</b>                               | <b>270</b>                                   |
| MRC-02  | 1            | 10            | 50%           | 4+2                             | 3060                  | 765                                      | 510                                          |
|         | 2            | 10            | 40%           | 1+3                             | 576                   | 576                                      | 144                                          |
|         | 3            | 10            | 90%           | 8+1                             | 5670                  | 709                                      | 630                                          |
|         | 4            | 10            | 50%           | 2+1                             | 333                   | 167                                      | 111                                          |
|         | 5            | 10            | 70%           | 1+2                             | 92                    | 92                                       | 31                                           |
|         | 6            | 10            | 80%           | 2+1                             | 106                   | 53                                       | 35                                           |
|         | <b>Total</b> | <b>60</b>     | <b>63%</b>    | <b>18+10</b>                    | <b>9837</b>           | <b>546</b>                               | <b>351</b>                                   |

\* Feeding rate = No. of engorged females / total No.

| <i>L. major</i> isolate | Mouse no. | No. of used sand fly females | Feeding rate (No. of engorged females/total) | No. of Leishmania positive females (fed+unfed) | First swelling appearance (weeks p.i.) | First lesion appearance (weeks p.i.) |
|-------------------------|-----------|------------------------------|----------------------------------------------|------------------------------------------------|----------------------------------------|--------------------------------------|
| MRC-01                  | 1         | 10                           | 60%                                          | 4+2                                            | 3                                      | 4                                    |
|                         | 2         | 10                           | 40%                                          | 2+5                                            | 4                                      | 5                                    |
|                         | 3         | 10                           | 70%                                          | 4+1                                            | -                                      | -                                    |
|                         | 4         | 10                           | 80%                                          | 4+0                                            | -                                      | -                                    |
|                         | 5         | 10                           | 100%                                         | 5+0                                            | 3                                      | 4                                    |
|                         | 6         | 10                           | 50%                                          | 2+2                                            | -                                      | -                                    |
| MRC-02                  | 7         | 10                           | 70%                                          | 3+1                                            | 3                                      | 4                                    |
|                         | 8         | 10                           | 50%                                          | 5+5                                            | 2                                      | 3                                    |
|                         | 9         | 10                           | 70%                                          | 6+1                                            | 2                                      | 3                                    |
|                         | 10        | 10                           | 70%                                          | 5+2                                            | 3                                      | 3                                    |
|                         | 11        | 10                           | 70%                                          | 2+1                                            | -                                      | 4                                    |

### Supplementary Table 1. Research Bank infections post bite in BALB/c mice

Table shows parasite load per ear determined by qPCR post bite with 10 infected sand flies (top; sheet 1) and fly feeding rates and rate of lesion development (bottom; sheet 2).
